# Supplementary material
Source: Copernicus journal article supplement (doi:10.5194/acp-26-7789-2026)
Supplement: Supplementary file 1 [file acp-26-7789-2026-supplement.pdf]

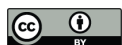

*Supplement of*

## **Quantifying meteorological impacts on local landfill methane emissions by using field measurements and machine learning**

**Donghee Kim et al.**

*Correspondence to:* Sujong Jeong (sujong@snu.ac.kr)

The copyright of individual parts of the supplement might differ from the article licence.

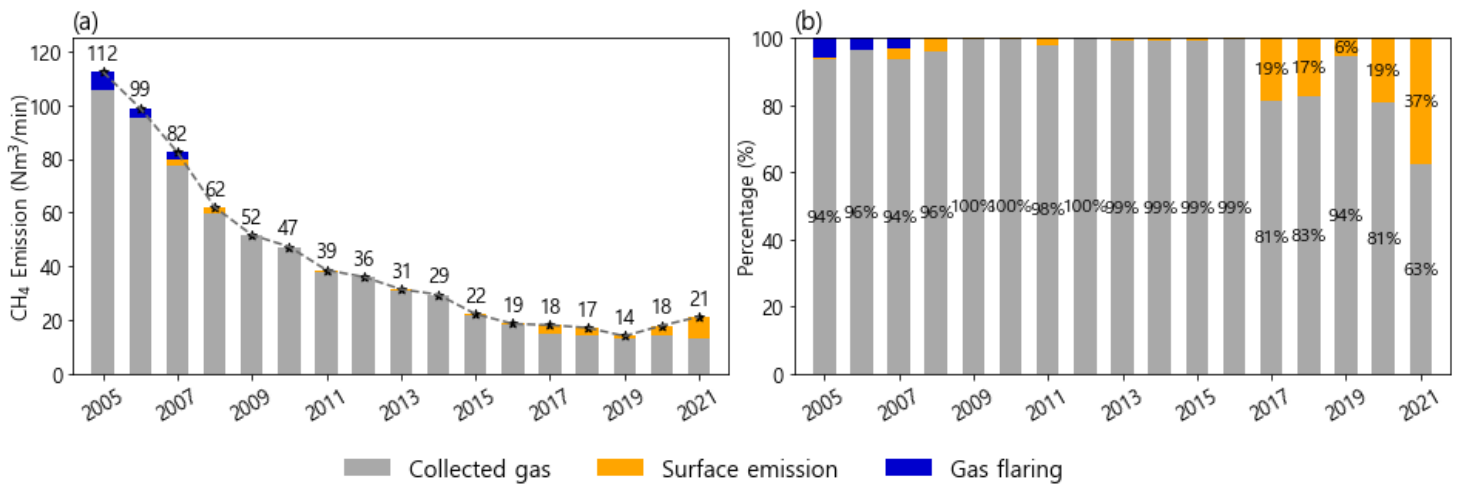

1 **Fig. S1. (a) Annual CH<sub>4</sub> emission fluxes by pathway at SLS 1, and (b) the corresponding**  
 2 **contribution of ratios of each pathway.**

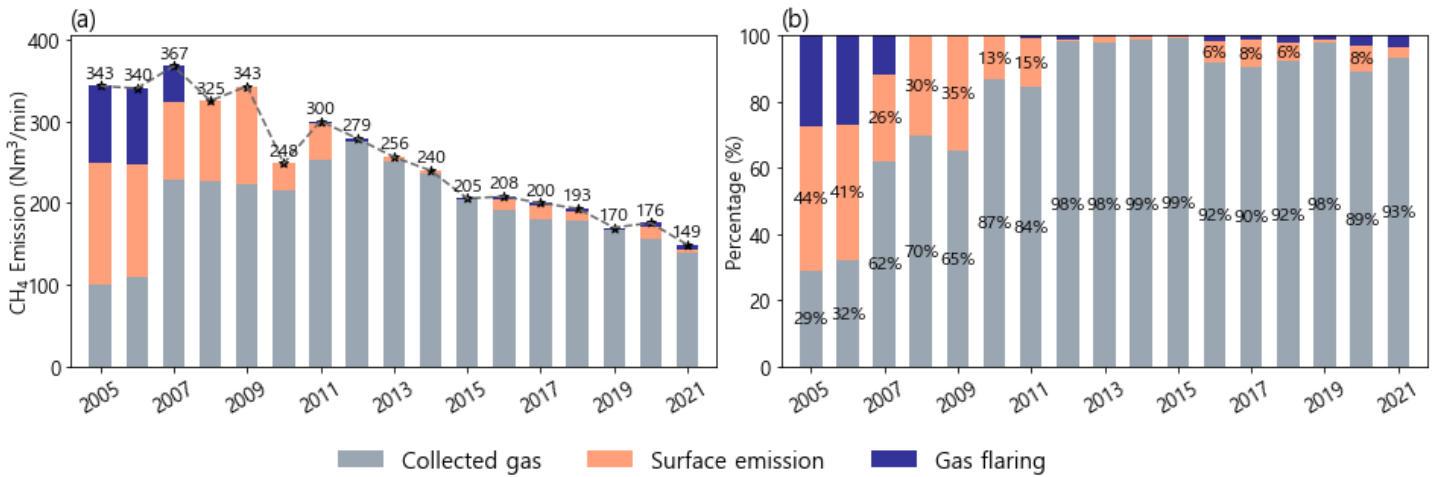

3 **Fig. S2. (a) Annual CH<sub>4</sub> emission fluxes by pathway at SLS 2, and (b) the corresponding**  
 4 **contribution of ratios of each pathway.**

5  
6  
7  
8  
9  
10  
11

1           To quantify the uncertainty in landfill CH<sub>4</sub> generation estimates, a Monte Carlo  
2 simulation was conducted. For each simulation run, uncertain inputs were randomly sampled  
3 from pre-defined probability distributions (Herrador & González, 2004; Kalos & Whitlock,  
4 2009; Papadopoulos & Yeung, 2001). The methane generation potential ( $L_0$ ) was assumed to  
5 be uniformly distributed within the range derived from the BMP test. For the first sudokwon  
6 landfill site (SLS 1), the waste composition of food, textile and yard waste ( $F$ ,  $TX$ ,  $Y$ ) were  
7 sampled from uniform distribution with a  $\pm 10\%$  uncertainty range, following the IPCC  
8 guidelines (Eggleston et al., 2006), due to the lack of period-specific composition data. In  
9 contrast, the second sudokwon landfill site (SLS 2) had annual waste composition data, a  
10 normal distribution was used to reflect the observed inter-annual variability. For seasonal  
11 variables, the values followed a normal distribution with the seasonal mean ( $\mu$ ) set to the  
12 observed seasonal value and the standard deviation set ( $\sigma$ ) to measurement error. The mass of  
13 waste ( $M$ ) was varied only during the actual landfilling duration. Temperature ( $T$ ) and  
14 precipitation ( $P$ ) data were sampled within each season to reflect seasonal characteristics. A  
15 total of 1,000 iterations were performed to ensure a stable and statistically significant sampling  
16 distribution. The model uncertainty was summarized using the empirical distribution of  
17 simulated CH<sub>4</sub> generation values, and the reported uncertainty bounds corresponds to the 2.5<sup>th</sup>-  
18 97.5<sup>th</sup> percentiles (95% interval).

19

1

2 **Table S1. Probabilistic characteristics of the random variables**

| Input ( $x_i$ )            | SLS 1 |                    |        |        |              | SLS 2   |                    |       |        |              |
|----------------------------|-------|--------------------|--------|--------|--------------|---------|--------------------|-------|--------|--------------|
|                            | Mean  | Standard deviation | Min    | Max    | Distribution | Mean    | Standard deviation | Min   | Max    | Distribution |
| $L_0$ (m <sup>3</sup> /Mg) | 40.2  |                    | 33.7   | 46.7   | Uniform      | 47.5    |                    | 37    | 58     | Uniform      |
| F (%)                      | 34.1  |                    | 30.7   | 37.5   |              | 13.7    | 8.3                | 6.8   | 38.7   |              |
| TX (%)                     | 4.7   |                    | 5.1    | 4.2    |              | 5       | 0.8                | 3.1   | 6.9    |              |
| Y (%)                      | 1.35  |                    | 1.2    | 1.5    |              | 1.2     | 0.6                | 0.5   | 2.9    |              |
| M (Gg/season)              | 1,827 | 711                | 136.08 | 3454.3 | Normal       | 1,155.2 | 342.9              | 311.1 | 3454.3 | Normal       |
| T <sub>spring</sub> (°C)   | 11.7  | 0.85               | 9.7    | 12.9   |              | 11.6    | 0.8                | 9.67  | 12.9   |              |
| T <sub>summer</sub> (°C)   | 23.8  | 0.88               | 21.8   | 25.3   |              | 23.9    | 0.8                | 22.3  | 25.3   |              |
| T <sub>fall</sub> (°C)     | 15.0  | 0.74               | 13.6   | 16.1   |              | 15.2    | 0.7                | 13.6  | 16.1   |              |
| T <sub>winter</sub> (°C)   | -0.05 | 1.16               | -2.7   | 2.4    |              | -0.03   | 1.3                | -2.7  | 2.43   |              |
| P <sub>spring</sub> (mm/d) | 2.2   | 0.92               | 0.4    | 4.4    |              | 2.2     | 1.0                | 0.4   | 4.4    |              |
| P <sub>summer</sub> (mm/d) | 7.7   | 2.81               | 3.1    | 15.0   |              | 7.6     | 3.0                | 3.1   | 15.0   |              |
| T <sub>fall</sub> (mm/d)   | 2.6   | 1.20               | 0.7    | 5.5    |              | 2.5     | 1.3                | 0.7   | 5.5    |              |
| T <sub>winter</sub> (mm/d) | 0.7   | 0.39               | 0.2    | 1.6    | 0.7          | 0.4     | 0.1                | 1.6   |        |              |

3

4

$$y = f(x_i) \quad (\text{Eq. S1})$$

5

$$Y = (y_1, y_2, \dots, y_M) = (f(x_1), f(x_2), \dots, f(x_M)) \quad (\text{Eq. S2})$$

6

7

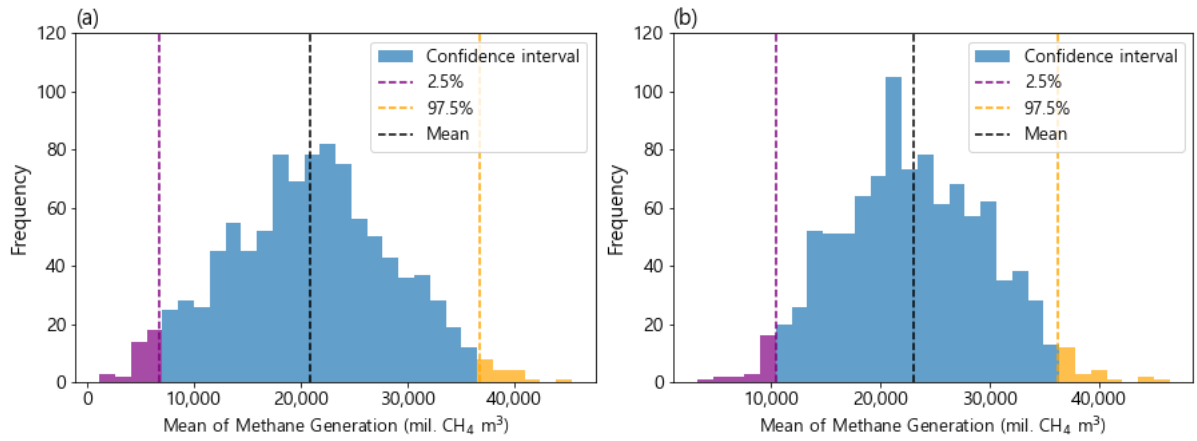

1

2 **Fig. S3. Histogram representing the result for the error of measurement estimated by**  
 3 **Monte Carlo simulation. The confidence interval (Blue bar), under 2.5% range (purple**  
 4 **line), upper 97.5% range (orange line) for (a) SLS 1 and (b) SLS 2.**

5

6

## 1 **References**

- 2 Eggleston, H., Buendia, L., Miwa, K., Ngara, T., and Tanabe, K.: 2006 IPCC guidelines for national greenhouse  
3 gas inventories, <https://www.ipcc-nggip.iges.or.jp/public/2006gl/> (last access: 16 March 2026), 2006
- 4 Herrador, M. A., and Gonzalez, A. G.: Evaluation of measurement uncertainty in analytical assays by means of  
5 Monte-Carlo simulation, *Talanta*, 64, 415-422, doi:10.1016/j.talanta.2004.03.011, 2004.
- 6 Kalos, M. H., and Whitlock, P. A.: Monte Carlo Methods, 2<sup>nd</sup> Edition, John Wiley & Sons, Hoboken, NJ, USA,  
7 doi:10.1002/9783527626212, 2008.
- 8 Papadopoulos, C. E., and Yeung, H.: Uncertainty estimation and Monte Carlo simulation method, *Flow Meas.*  
9 *Instrum.*, 12, 291-298, doi:10.1016/S0955-5986(01)00015-2, 2001.

10
